# Supplementary material for: Genetic specification of left–right asymmetry in the diaphragm muscles and their motor innervation
Source: eLife journal article supplement (doi:10.7554/elife.18481), 2017-06-22
Supplement: figures [file elife-18481-figures-v1.pdf]

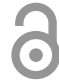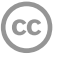

---

## Figures and figure supplements

Genetic specification of left–right asymmetry in the diaphragm muscles and their motor innervation

**Camille Charoy *et al***

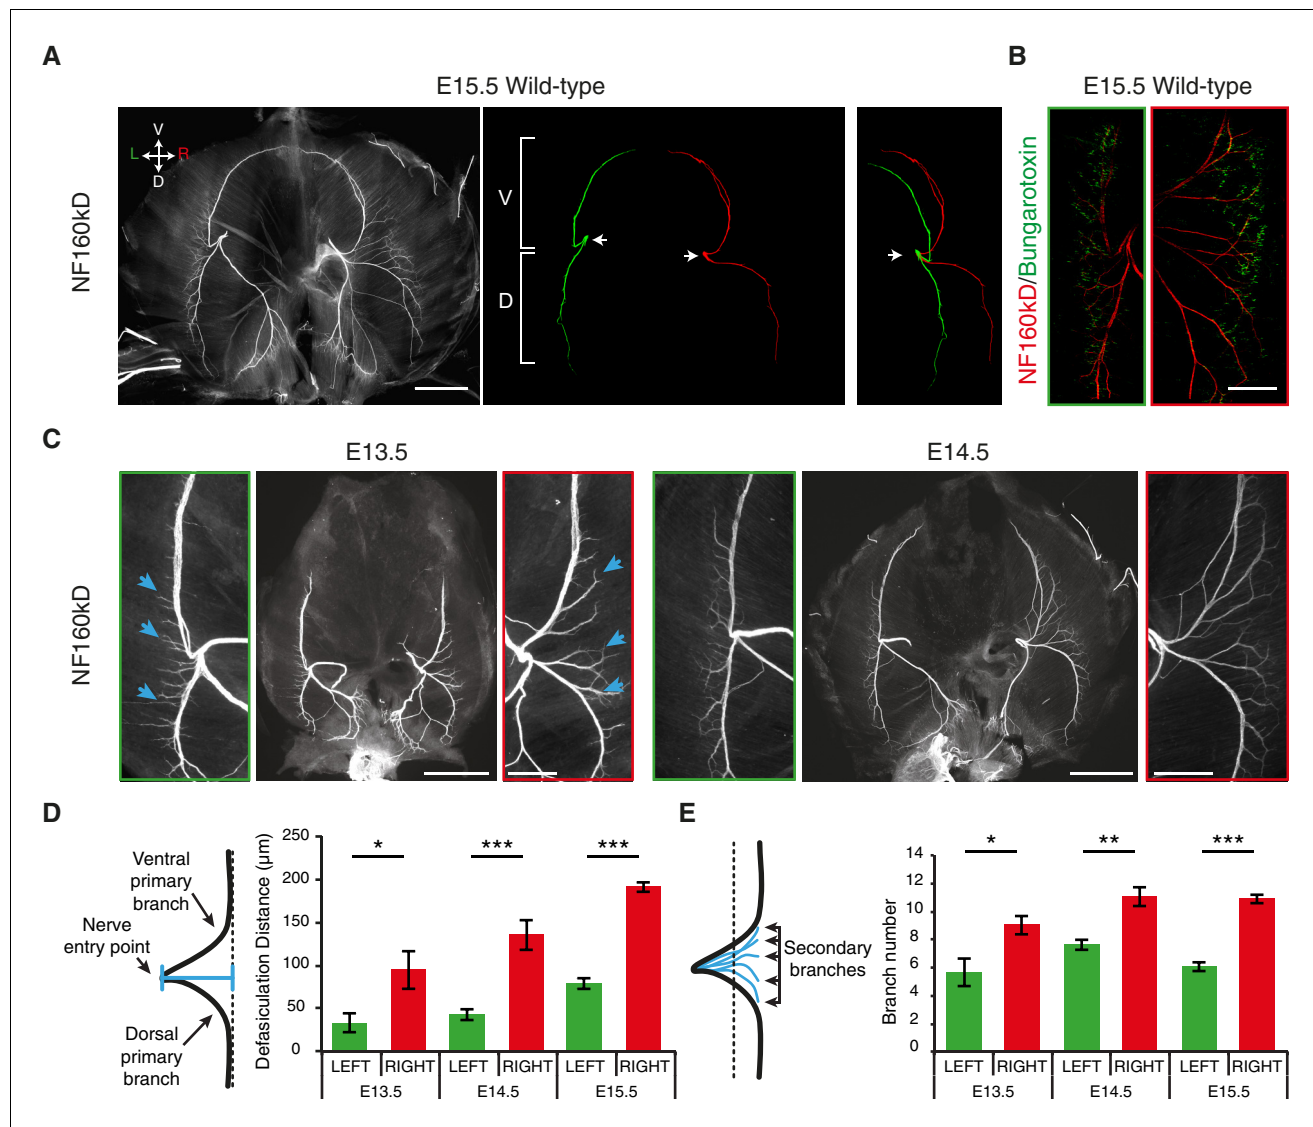

**Figure 1.** L/R asymmetries of the phrenic nerve patterns are established from the onset of diaphragm innervation. (A) Neurofilament (NF) staining showing the branching patterns of the left and right phrenic nerves in whole-mount E15.5 mouse diaphragm. Left and right primary branches are pseudocolored (middle panel) in green and red, respectively. (See [Figure 1—figure supplement 1A](#), for complete branch traces). L/R asymmetry is especially apparent after superimposing the left and right primary branches (right panel). Arrows point to the nerve entry points. Images are top views of the whole diaphragm, oriented as indicated in the top left hand corner of the left panel (V, Ventral; D, Dorsal; L, Left; R, Right). (B) NF and Bungarotoxin staining showing the asymmetry of acetylcholine receptor clusters and nerve domains on the left (left panel, green frame) and right (right panel, red frame) diaphragm muscles of an E15.5 embryo (see [Figure 1—figure supplement 2](#) for quantification). (C) NF staining showing the patterns of left and right phrenic nerves at E13.5 and E14.5. Green- and red-framed panels show enlarged images of the left and right phrenic nerves, respectively. (D) Schematics showing the method used to quantify the defasciculation distance (shown in blue), from the nerve entry point to the dotted line and histogram of the defasciculation distance at E13.5, E14.5 and E15.5 (E13.5 — left  $32.76 \pm 11.01$ , right  $94.82 \pm 21.94$ ,  $N = 9$ ,  $p = 0.0106$ ; E14.5 — left  $42.56 \pm 4.16$ , right  $135.71 \pm 10.20$ ,  $N = 8$ ,  $p = 0.00015$ ; E15.5 — left  $77.16 \pm 7.32$ , right  $188.51 \pm 7.01$ ,  $N = 18$ ,  $p = 4 \times 10^{-10}$ , Mann-Whitney). (E) Schematics showing the method used to quantify the secondary branch number by counting the number of NF-positive fascicles that crossed the dotted line positioned at 80% of the defasciculation distance and histogram of the secondary branch number at E13.5, E14.5 and E15.5 (E13.5 — left  $5.55 \pm 0.96$ , right  $8.88 \pm 0.65$ ,  $N = 9$ ,  $p = 0.0288$ ; E14.5 — left  $7.5 \pm 0.38$ , right  $10.88 \pm 0.69$ ,  $N = 8$ ,  $p = 0.00117$ ; E15.5 — left  $5.94 \pm 0.31$ , right  $10.7 \pm 0.3$ ,  $N = 18$ ,  $p = 2.35 \times 10^{-7}$ , Mann-Whitney). Histograms show the mean  $\pm$  SEM for each stage. Scale bars: 200  $\mu$ m (A,C); 100  $\mu$ m (B). Numerical values used to generate the graphs are accessible in [Figure 1—source data 1](#).

DOI: [10.7554/eLife.18481.003](https://doi.org/10.7554/eLife.18481.003)

The following source data is available for figure 1:

**Source data 1.** Left and right measures of the defasciculation distance and branch number in E13.5, E14.5 and E15.5 mouse embryos.

DOI: [10.7554/eLife.18481.004](https://doi.org/10.7554/eLife.18481.004)

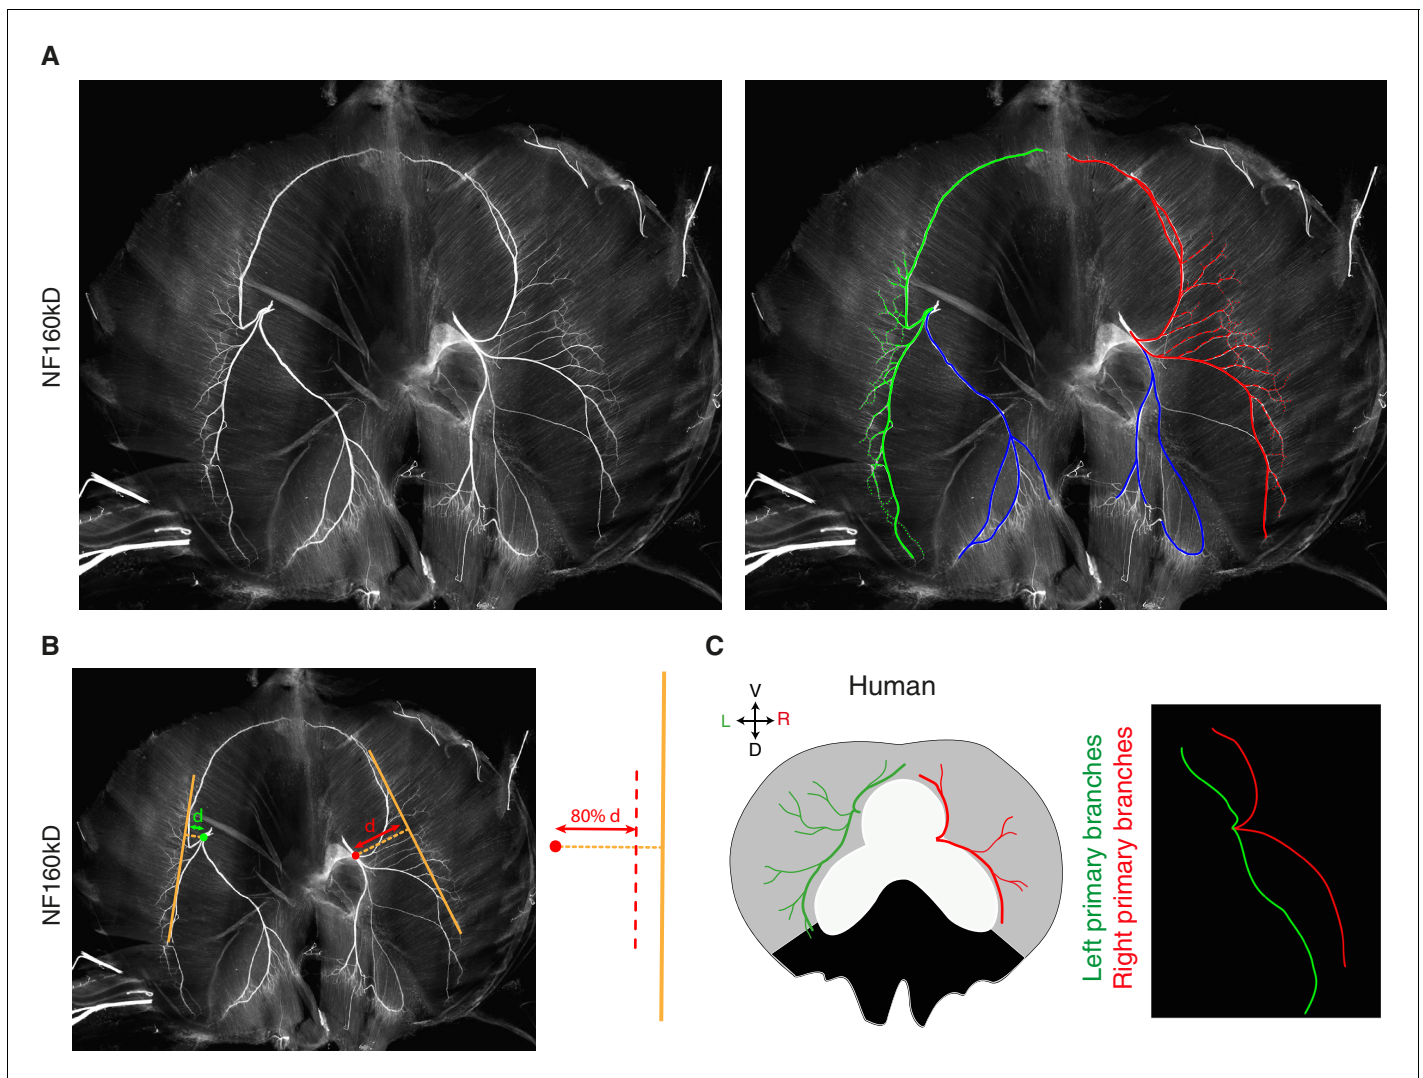

**Figure 1—figure supplement 1.** Phrenic nerve patterns and quantification in mice and L/R nerve asymmetry in a human diaphragm. (A) NF staining showing the branching patterns of the left and right phrenic nerves in a whole-mount E15.5 mouse diaphragm. In the right panel, the primary, secondary and tertiary branches of the left and right phrenic nerves are traced in green and red, respectively. The left and right crural phrenic nerves are traced in blue. (B) Example of quantification on an NF-labelled wholemount diaphragm. (C) L versus R differences of nerve pattern in human diaphragms, the left (green) and right (red) branches are innervating the lateral muscle (grey regions). Reproduced from the original figure of *Hidayet et al. (1974)*. The L/R asymmetry is especially apparent after superimposing the left and right nerve pattern (right panel). DOI: [10.7554/eLife.18481.005](https://doi.org/10.7554/eLife.18481.005)

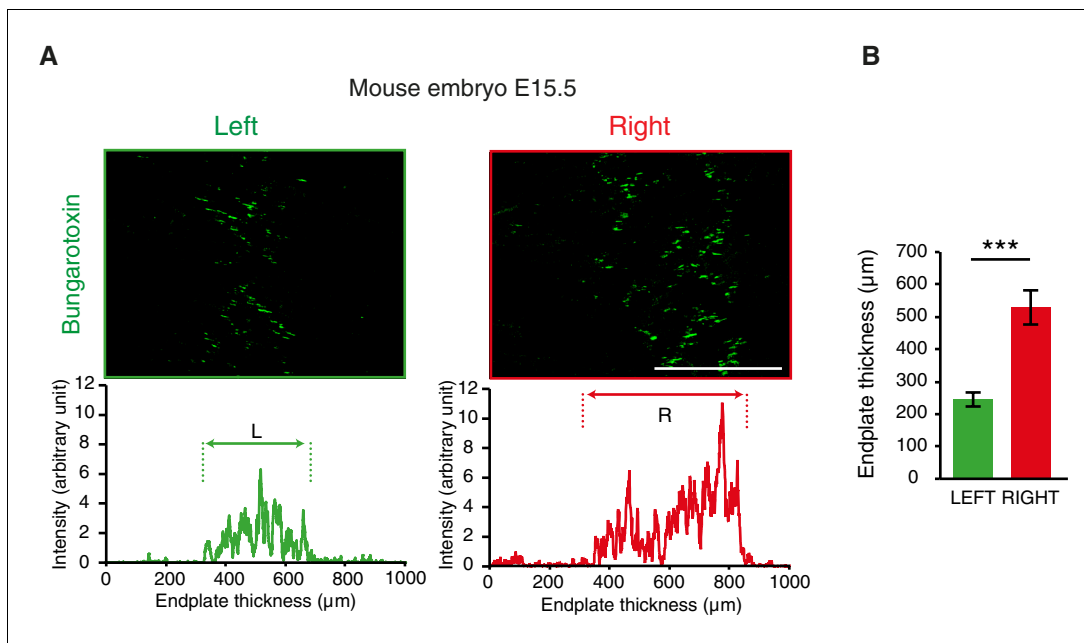

**Figure 1—figure supplement 2.** L/R differences of acetylcholine clusters during synaptogenesis. (A) Bugarotoxin staining on the left and right sides of an E15.5 mouse diaphragm and plot profile showing the asymmetry of the clusters of acetylcholine receptor indicative of the endplate thickness (left and right in green and red, respectively). (B) Histogram showing the quantification of the endplate thickness (left:  $254.9 \pm 22.2$ , right:  $529.3 \pm 53.0$ ,  $N = 11$ ,  $p=0.00097$ , Wilcoxon signed rank). Scale bars:  $200 \mu\text{m}$ . Numerical values used to generate the graphs are accessible in **Figure 1—figure supplement 2—source data 1**.

DOI: [10.7554/eLife.18481.006](https://doi.org/10.7554/eLife.18481.006)

The following source data is available for figure 1:

**Figure supplement 2—Source data 1.** Left and right endplate thicknesses measured from Bugarotoxin labeling in E15.5 mouse embryos.

DOI: [10.7554/eLife.18481.007](https://doi.org/10.7554/eLife.18481.007)

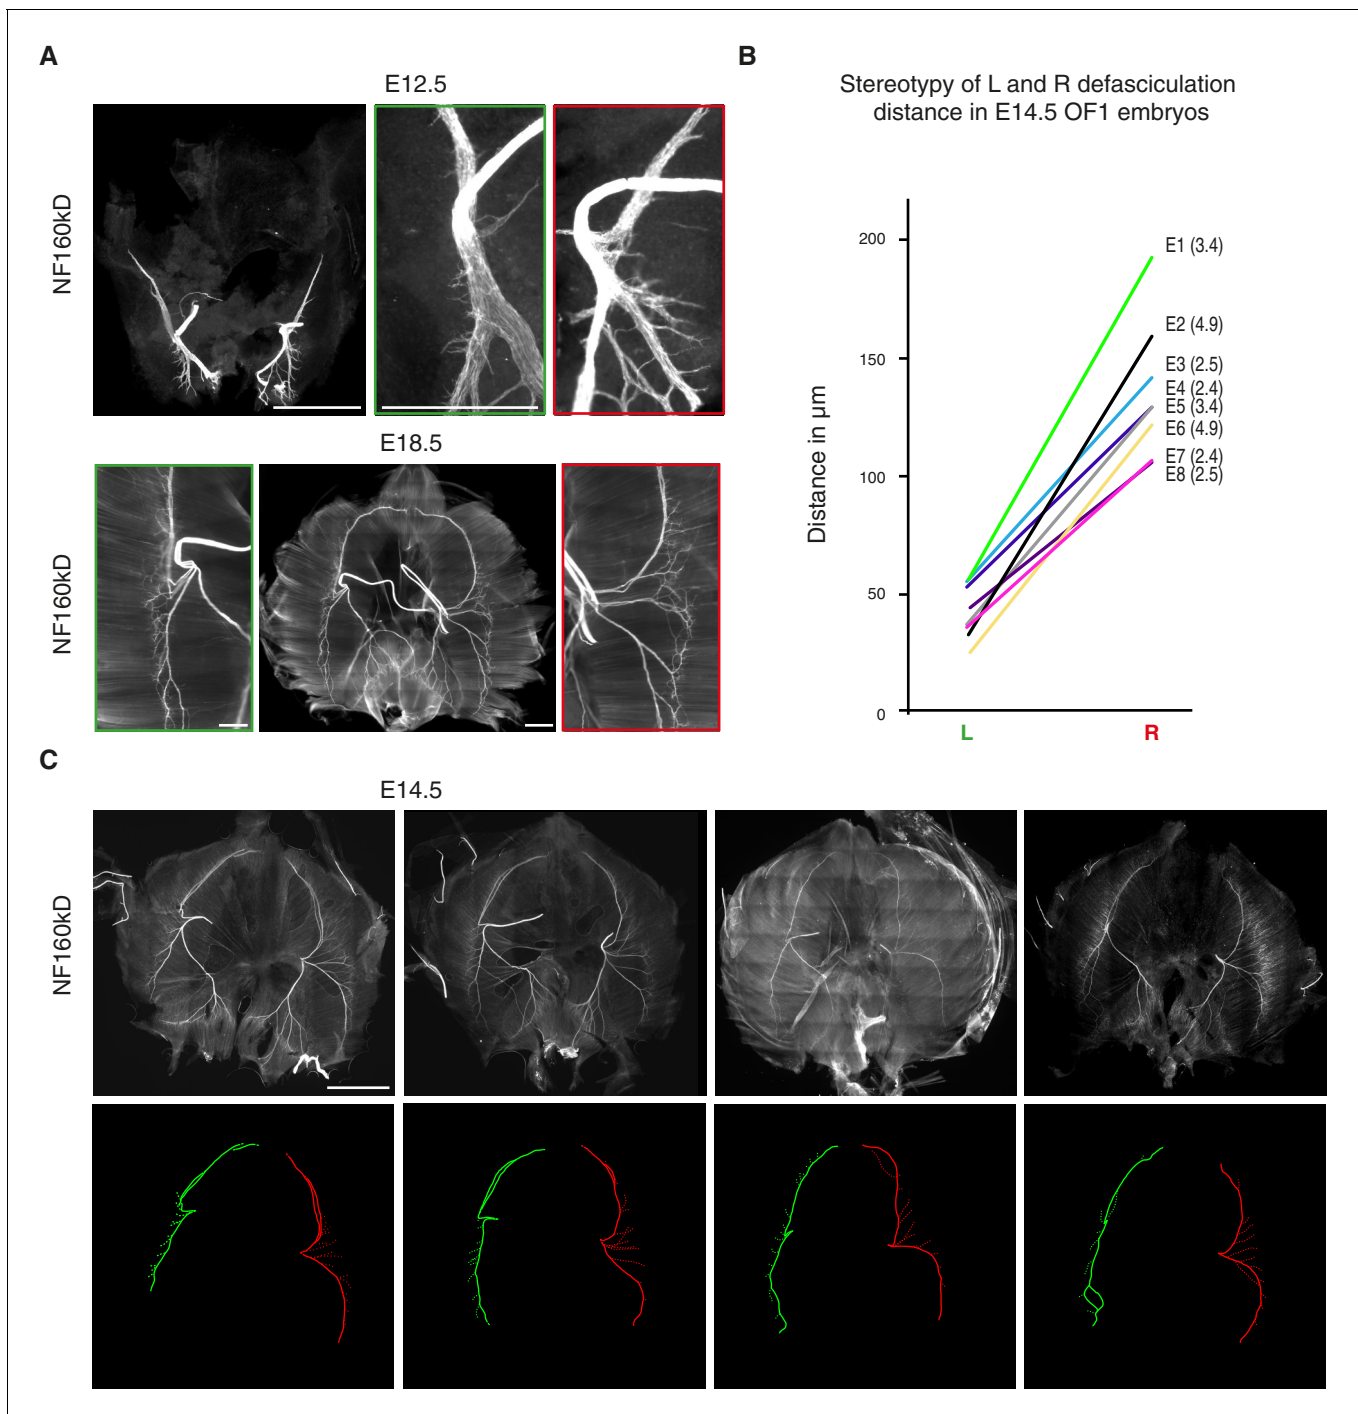

**Figure 1—figure supplement 3.** Stereotypy and variability of L/R asymmetry of the phrenic nerve patterns. (A) NF staining showing the patterns of left and right phrenic nerves at E12.5 and E18.5. Green- and red-framed panels show enlarged images of the left and right phrenic nerves, respectively. Note that at E12.5, the dorsal and ventral branches have already split with different angles on the left and right sides (left:  $166^\circ \pm 4^\circ$ ; right:  $132^\circ \pm 4^\circ$ ;  $N = 8$ ). (B) Ladder graph showing the stereotypy of the left and right defasciculation distances for eight E14.5 embryos (E1 to E8) (ratio shown in brackets). (C) NF staining of whole-mount diaphragms from E14.5 mouse embryos showing the phrenic nerve pattern variability at that stage. Left (green) and right (red) primary branch traces are shown in the lower panels. Scale bars: 200  $\mu\text{m}$ , 100  $\mu\text{m}$  for enlargement panels. The numerical values used to generate the graphs are accessible in **Figure 1—figure supplement 3—source data 2**.

DOI: [10.7554/eLife.18481.008](https://doi.org/10.7554/eLife.18481.008)

The following source data is available for figure 1:

**Figure supplement 3—Source data 2.** Paired analysis of left and right defasciculation distances in E14.5 mouse embryos.

DOI: [10.7554/eLife.18481.009](https://doi.org/10.7554/eLife.18481.009)

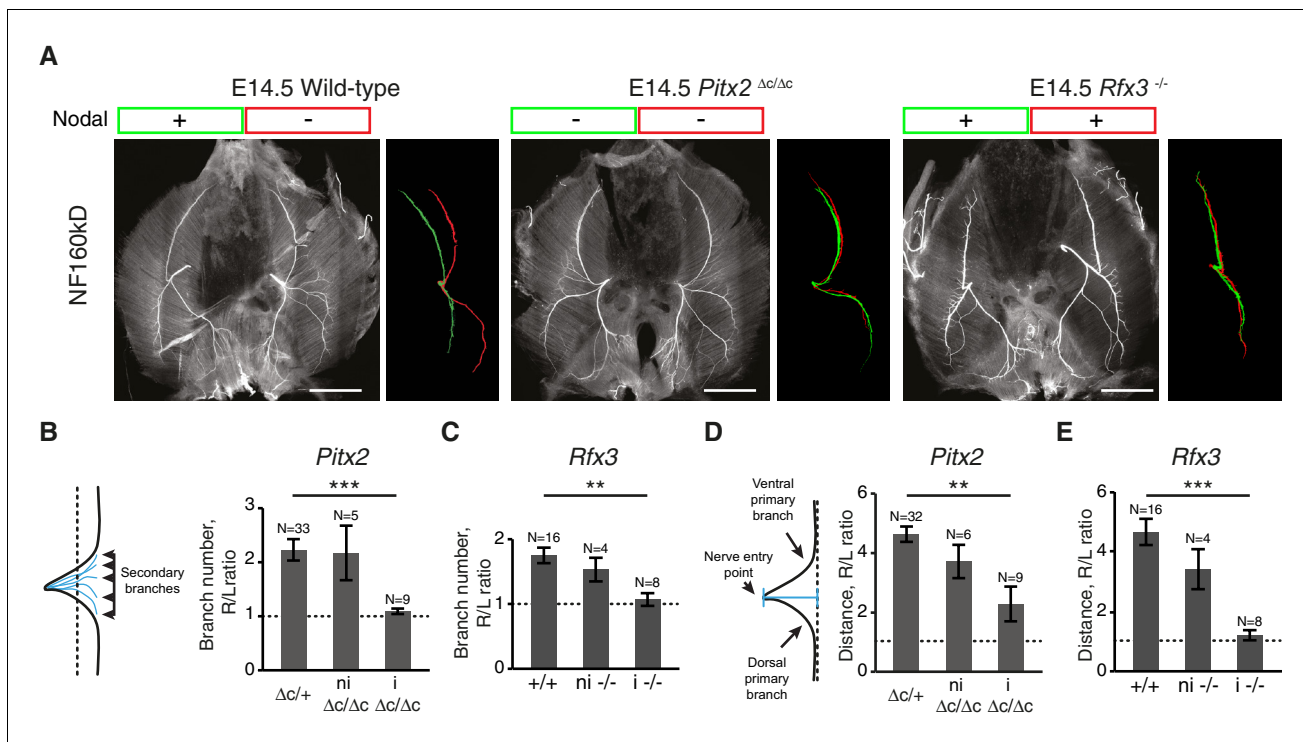

**Figure 2.** L/R asymmetries of the phrenic nerve patterns require Nodal signaling. (A) NF staining of E14.5 diaphragms from wild-type, *Pitx2*<sup>ΔC/ΔC</sup> and *Rfx3*<sup>-/-</sup> embryos with the respective superimposed L/R nerve pattern and the Nodal expression. (B–C) Schematic of the secondary branches quantification and histograms of the R/L ratios of secondary branches: *Pitx2*<sup>ΔC/+</sup> and *Pitx2*<sup>+/+</sup> 2.23 ± 0.20, versus *Pitx2*<sup>ΔC/ΔC</sup> with lung isomerism 1.09 ± 0.05,  $p=4.493E-5$  (B); *Rfx3*<sup>+/+</sup> and *Rfx3*<sup>-/-</sup> 1.75 ± 0.12, versus *Rfx3*<sup>-/-</sup> with lung isomerism 1.07 ± 0.10,  $p=0.002884$ , Mann-Whitney (C). (D–E) Schematic of the defasciculation distance measurements and histograms of the R/L ratios of defasciculation distance for: *Pitx2*<sup>ΔC/+</sup> and *Pitx2*<sup>+/+</sup> 4.63 ± 0.26, versus *Pitx2*<sup>ΔC/ΔC</sup> with visceral isomerism: 2.28 ± 0.59,  $p=0.001268$ , Mann-Whitney (D); *Rfx3*<sup>+/+</sup> and *Rfx3*<sup>-/-</sup> 4.62 ± 0.43, versus *Rfx3*<sup>-/-</sup> with visceral isomerism 1.35 ± 0.19,  $p=2.719E-6$ , Mann-Whitney (E). Note that there is no lung isomerism in wild-type embryos. Histograms show the mean ± SEM. Numbers above bars indicate the number of embryos analysed. ni, non-isomeric (embryos that did not exhibit visceral isomerism); i, isomeric. Scale bars: 200 μm. Numerical values used to generate the graphs are accessible in **Figure 2—source data 1**.

DOI: 10.7554/eLife.18481.010

The following source data is available for figure 2:

**Source data 1.** Ratios of the defasciculation distance and branch number in E14.5 mouse embryos of *Pitx2C* and *Rfx3* lines.

DOI: 10.7554/eLife.18481.011



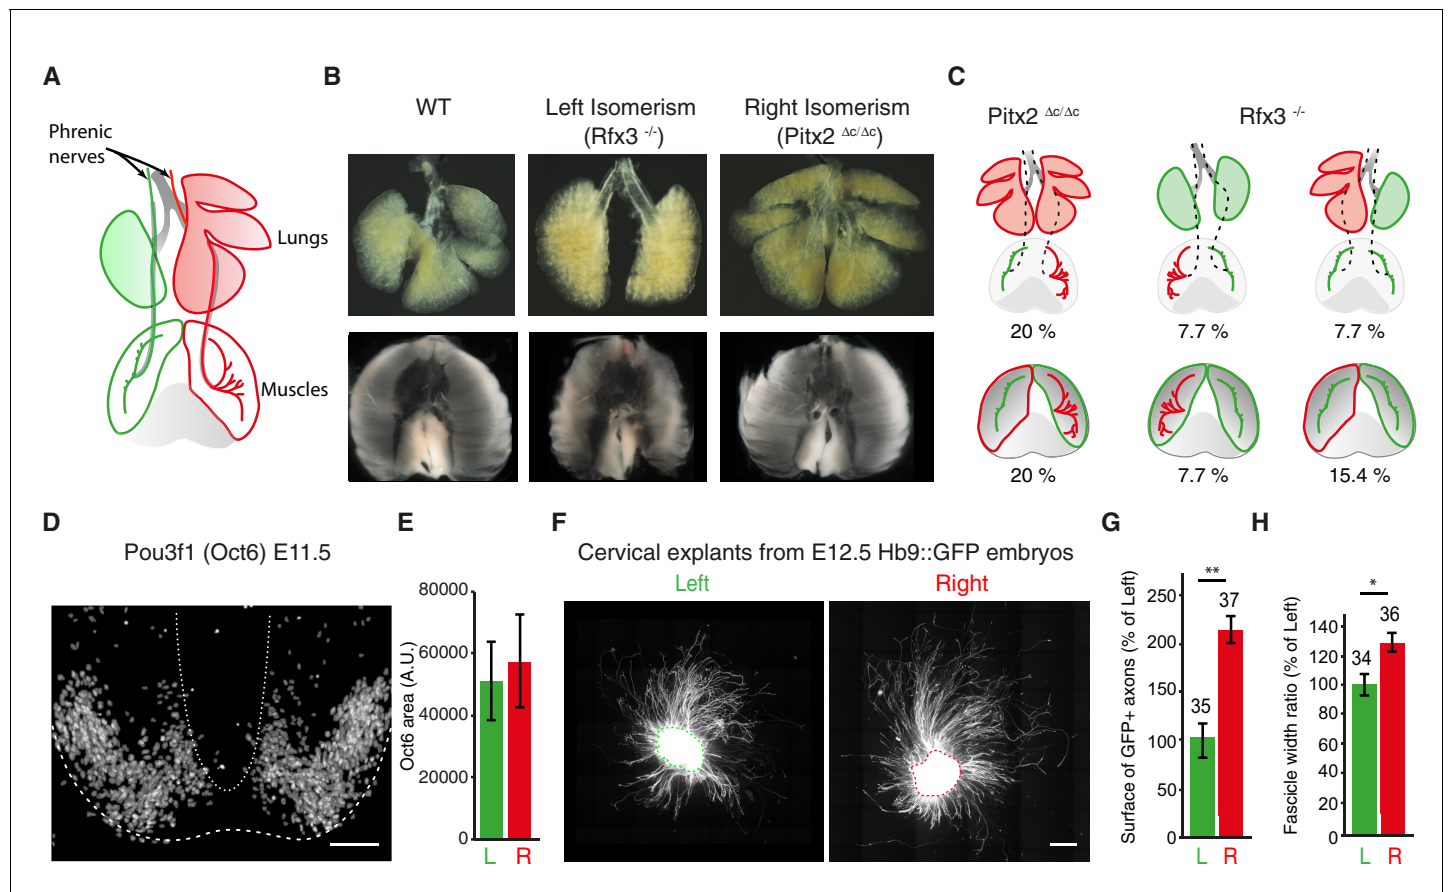

**Figure 3.** The asymmetry of phrenic circuits results from an intrinsic neuronal program. (A) Schematic representation of the organisation of the phrenic nerves as they pass through the lungs and reach the diaphragm. (B) Photomicrographs of the expected L/R asymmetry of lungs and diaphragm muscles at E14.5 in wild-type embryos and the altered L/R asymmetry observed in the *Rfx3*<sup>-/-</sup> and *Pitx2*<sup>ΔC/ΔC</sup> mutant embryos. Quantification of diaphragm muscle asymmetry: *Pitx2*<sup>+/+</sup> and *Pitx2*<sup>ΔC/ΔC</sup> 6.25 ± 0.68, N = 20, versus *Pitx2*<sup>ΔC/ΔC</sup> iso 0.26 ± 0.6, N = 6; *Rfx3*<sup>+/+</sup> and *Rfx3*<sup>-/-</sup> 7.02 ± 0.74, N = 17 versus *Rfx3*<sup>-/-</sup> iso 0.72 ± 1.6, N = 7 (see methods). (C) Schematic representation of L/R asymmetries in the lungs, diaphragm muscles and phrenic nerves. A colour code is used to show the uncoupling occurring between phrenic nerve and lung asymmetries or phrenic nerve and diaphragm muscle asymmetries. Any structure represented in green is indicative of its left characteristics, whether it is observed on the left or the right side of the embryo, whereas red structures represent right characteristics. (D) Pou3f1 (Oct6) staining showing the pool of phrenic motoneurons, projection formed by serial sections of the entire cervical region of an E11.5 spinal cord embryo. (E) Histogram showing the area positive for the Pou3f1 (Oct6) labeling in the left and right cervical motoneuron domains (N = 3, p=0.5, Wilcoxon signed rank). (F) GFP staining of ventral cervical spinal cord explants from E12.5 Hb9::GFP embryos; the dashed line is indicative of the explant border. (G) Quantification of the area occupied by GFP-positive axons for left and right explants (left — 100% ± 17.4; right — 214% ± 30.2, p=0.0045, Mann-Whitney). (H) Quantification of the width ratio (see **Figure 3—figure supplement 1** for quantification details) (left — 100% ± 7.3; right — 127% ± 8.0, p=0.0127, Mann-Whitney). Numbers above bars indicate the numbers of explants analysed. Histograms show the mean ± SEM. Scale bars: 100 μm (D), 200 μm (F). Numerical values used to generate the graphs are accessible in **Figure 3—source data 1**.

DOI: 10.7554/eLife.18481.012

The following source data is available for figure 3:

**Source data 1.** Pool size and in vitro axon growth from left and right motoneurons.

DOI: 10.7554/eLife.18481.013

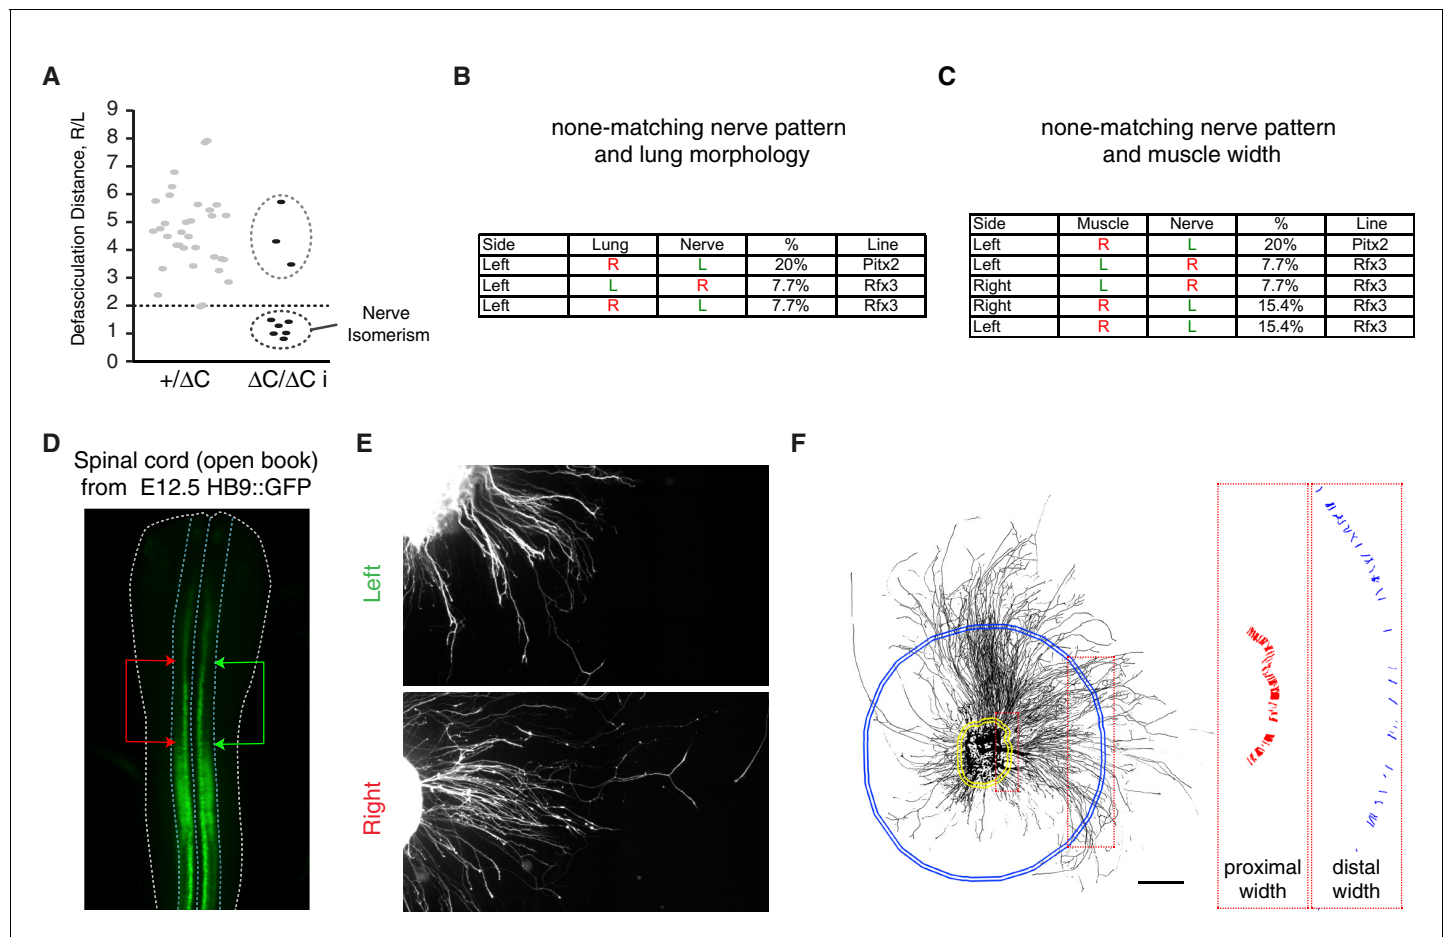

**Figure 3—figure supplement 1.** Uncoupling between lung or muscle and nerve asymmetry and intrinsic L/R differences of axon growth from cultured cervical motoneuron explants. (A) Distribution of the defasciculation distance ratio amongst E14.5 *Pitx2*<sup>+ΔC</sup> and *Pitx2*<sup>ΔC/ΔC</sup> embryos. Values for *Pitx2*<sup>+ΔC</sup> and *Pitx2*<sup>ΔC/ΔC</sup> embryos are pooled. Two clearly separated groups are visible amongst the *Pitx2*<sup>ΔC/ΔC</sup> embryos, one below the dashed line composed of embryo with nerve isomerism and one above the line composed of normally asymmetric nerves. (B–C) Table showing the uncoupling observed between the nerve pattern and lung morphology (B) or the nerve pattern and muscle morphology (C) in the *Pitx2*C and *Rfx3* mutant embryos and its frequency. (D) Photomicrograph of the GFP signal observed from HB9::GFP spinal cord. The blue dashed line outlines the ventral spinal cord and the white dashed line outlines the spinal cord. The arrows delimit the area of interest. (E) Photomicrographs illustrating the defasciculation behaviours of GFP-labelled axons extending from left (top panel) or right (bottom panel) ventral cervical spinal cord explants from E12.5 HB9::GFP embryos. (F) Quantification method used to calculate the area occupied by GFP-positive axons and defasciculation index. The binary image (left panel) shows the GFP-positive area extracted with the ImageJ plugin NeuriteJ that was used to calculate the area. The proximal (yellow in left panel) and the distal (blue in left panel) selections are created using the same plugin. The width of each fasciculus crossing the proximal and distal selections was measured and the defasciculation index calculated. Scale bar: 300 μm (F). Numerical values used to generate the graphs are accessible in **Figure 3—figure supplement 1—source data 1**.

DOI: 10.7554/eLife.18481.014

The following source data is available for figure 3:

**Figure supplement 1—Source data 1.** Distribution of defasciculation ratios in the *Pitx2*C mouse line.

DOI: 10.7554/eLife.18481.015



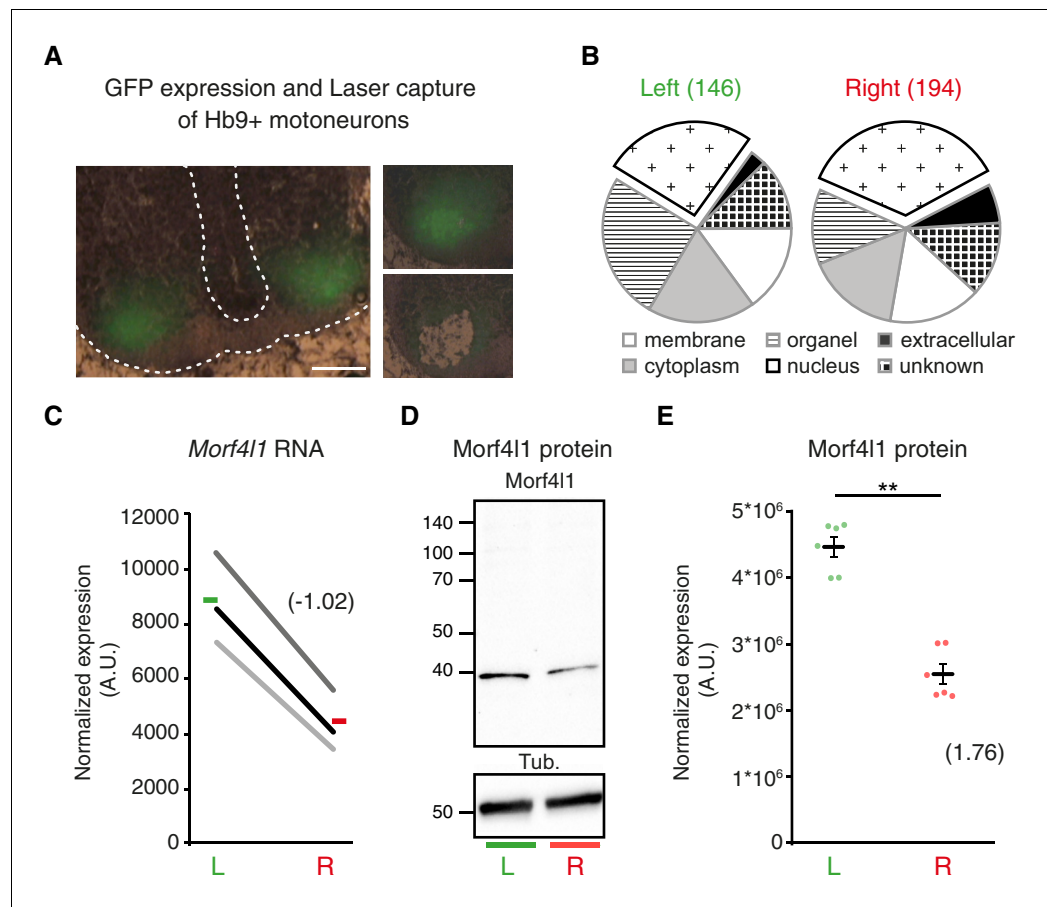

**Figure 4.** L/R molecular signature of cervical motoneurons. (A) Transverse sections of E11.5 Hb9::GFP embryo cervical spinal cord, illustrating the areas used for laser-capture microdissection. (B) Pie charts showing the proportion of left-enriched and right-enriched genes according to their Gene Ontology 'cellular component' terms. The 'nucleus' component is detached from the pie. (C) Ladder graph showing the left and right expression of *Morf4l1* in three embryos. Average L/R fold-change shown in brackets. (D) Immunodetection of Morf4l1 and loading control tubulin (Tub.) in left and right ventral cervical spinal cord tissues. (E) Graph showing normalized protein levels of Morf4l1 in left and right ventral cervical spinal cords from E11.5 mouse embryos. Individual values observed for the six western-blot (dots) and mean  $\pm$  SEM are represented (L/R ratio:  $1.81 \pm 0.163$ , L versus R;  $p=0.0022$ , Wilcoxon signed rank). Average L/R fold-change shown in brackets. Scale bar: 100  $\mu$ m. Numerical values used to generate the graphs are accessible in **Figure 4—source data 3**.

DOI: [10.7554/eLife.18481.016](https://doi.org/10.7554/eLife.18481.016)

The following source data is available for figure 4:

**Source data 1.** List of enriched genes in the left cervical motor neurons of Hb9::GFP embryos at E11.5.

DOI: [10.7554/eLife.18481.017](https://doi.org/10.7554/eLife.18481.017)

**Source data 2.** List of enriched genes in the right cervical motor neurons of Hb9::GFP embryos at E11.5.

DOI: [10.7554/eLife.18481.018](https://doi.org/10.7554/eLife.18481.018)

**Source data 3.** Lateralization expression of Morf4l1 in cervical motoneurons.

DOI: [10.7554/eLife.18481.019](https://doi.org/10.7554/eLife.18481.019)

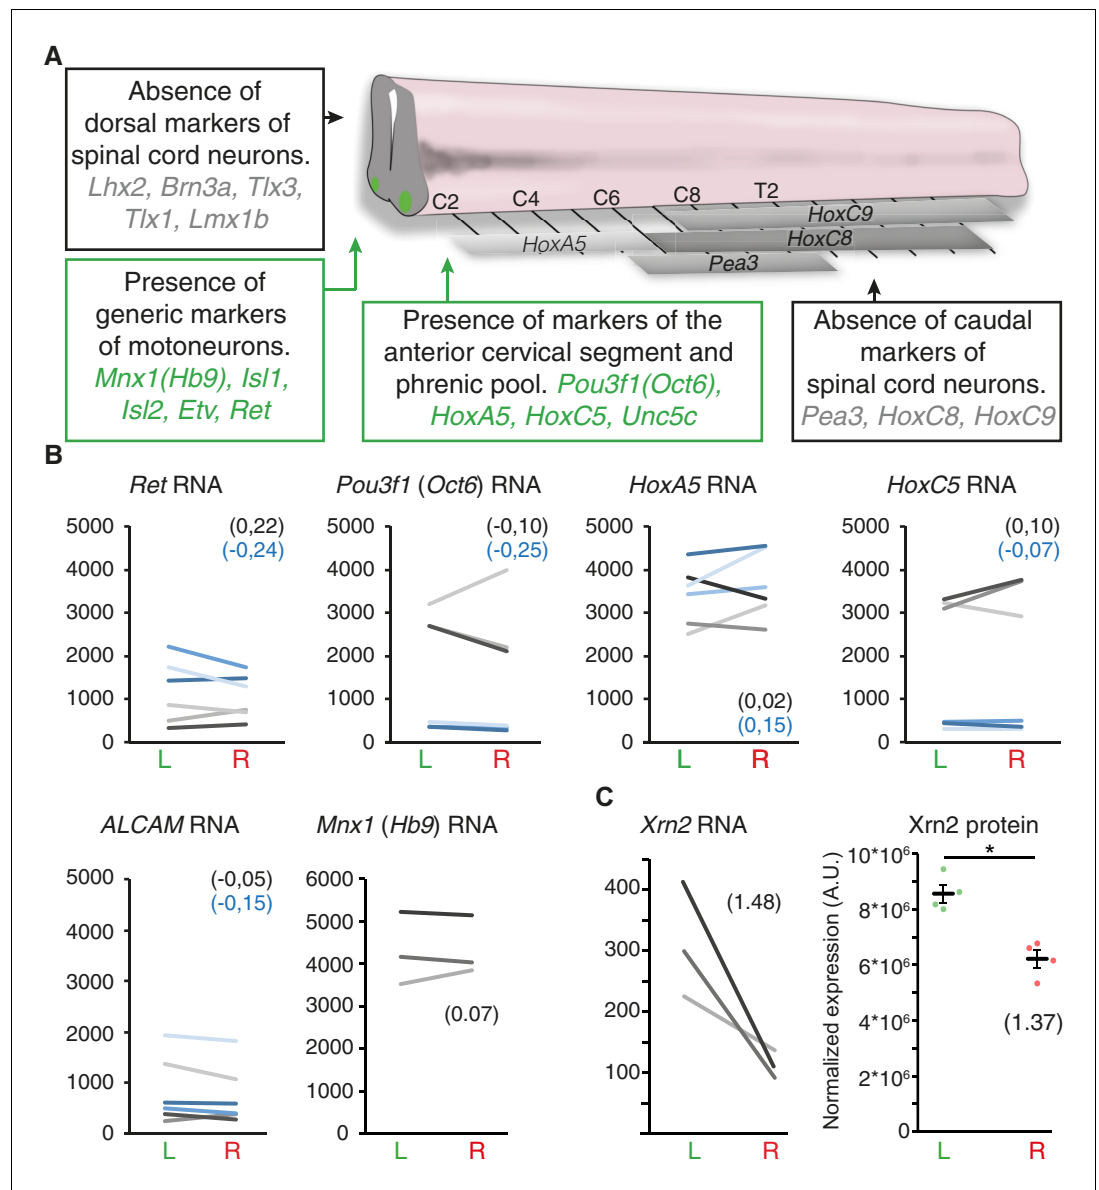

**Figure 4—figure supplement 1.** Symmetric expression of phrenic motoneuron markers, and lateralized *Xrn2* expression. (A) Schematic representation of the spinal cord that depicts the expression domain of *Hox* genes and brachial-specific *Pea3* (*Etv4*) transcription factor. Boxes represent present/absent call tests indicating that markers of dorsal spinal cord and brachial motoneurons are absent. By contrast, generic markers of motoneurons as well as markers that are enriched in cervical and phrenic motoneurons are present in all three embryos. (B) Ladder graphs showing the normalized expression signals in the left and right laser-captured samples of the three embryos for probes that detect *Ret*, *Pou3f1* (*Oct6*), *HoxA5*, *HoxC5*, *ALCAM* and *Mnx1* (*Hb9*) RNA. The average  $\log_2$  (R/L) ratios are indicated in brackets in black for probe one and blue for probe 2. None of these probes showed significant L/R difference according to the threshold used (see Materials and methods). (C) Ladder graph of *Xrn2* RNA expression in left and right samples from the three embryos (left panel), average  $\log_2$  (R/L) ratio indicated in brackets. Graph showing the left and right normalized protein levels of *Xrn2* in ventral cervical spinal cord from E11.5 embryos. Values of the four western-blot (dots) and mean  $\pm$  SEM are represented (L/R fold-change 1.37  $\pm$  0.13, L versus R,  $p=0.028$ ; Mann-Whitney) (right panel). Numerical values used to generate the graphs are accessible in **Figure 4—figure supplement 1—source data 1**.

DOI: 10.7554/eLife.18481.020

The following source data is available for figure 4:

**Figure supplement 1—Source data 1.** RNA level of motoneuron markers and asymmetric expression of *Xrn2*.

DOI: 10.7554/eLife.18481.021

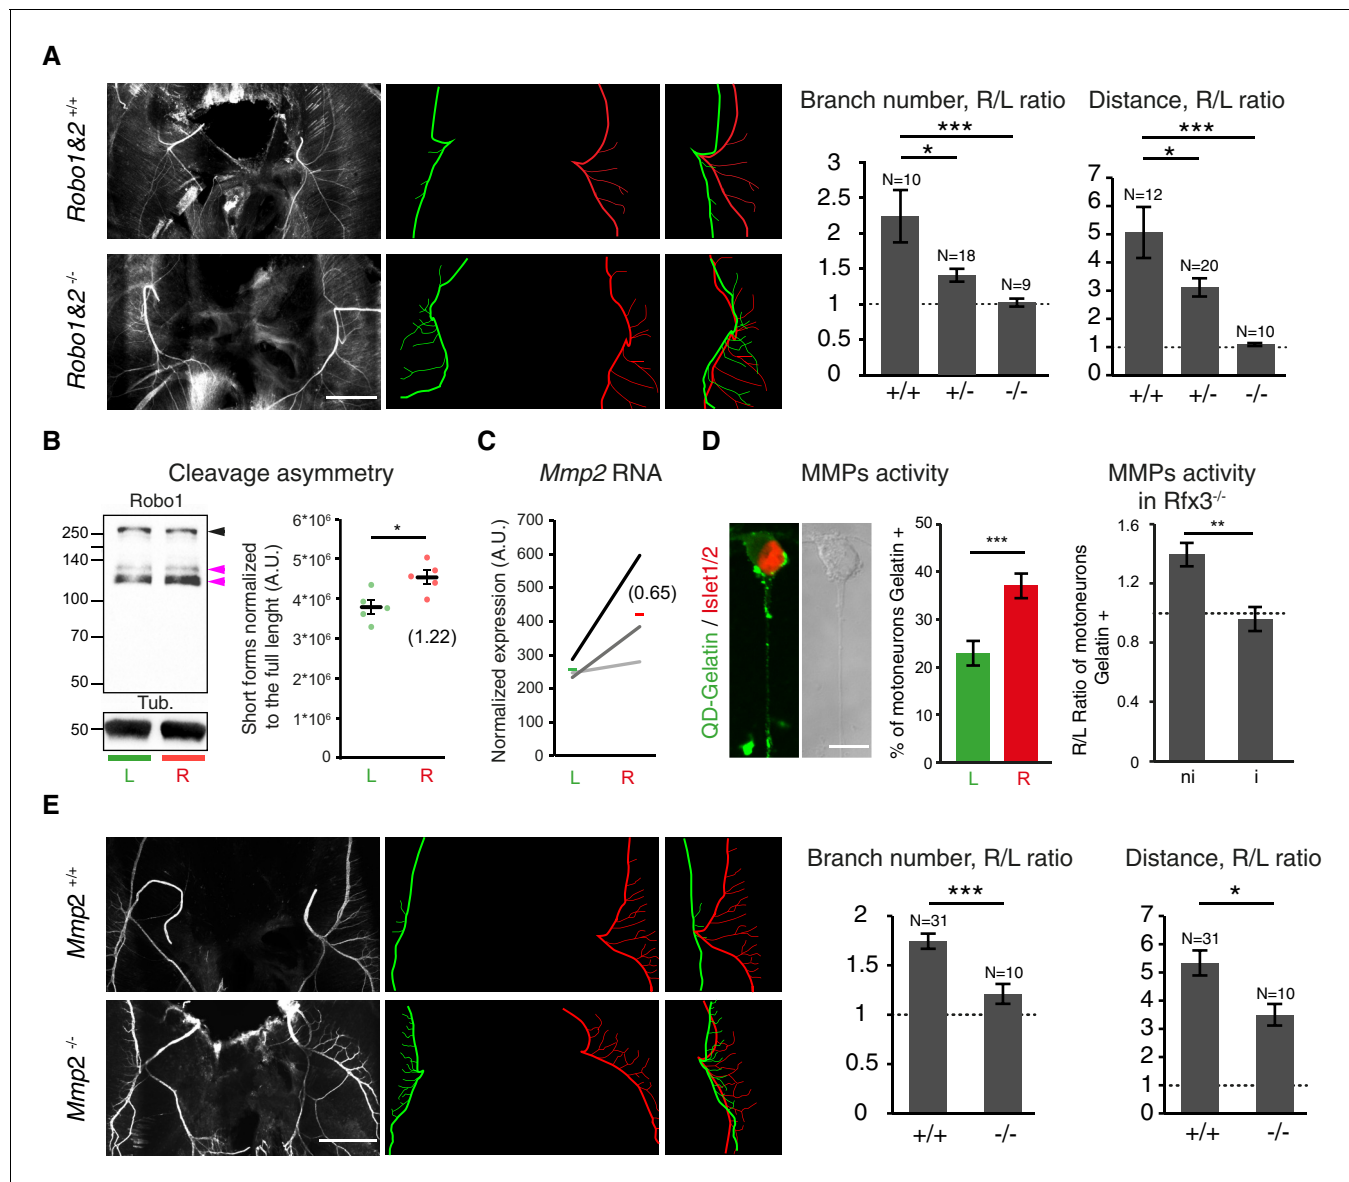

**Figure 5.** Slit/Robo signalling and MMP2 control asymmetry of L/R phrenic nerves. (A) NF staining of E14.5 diaphragm from *Robo1*<sup>+/+</sup> and *Robo2*<sup>+/+</sup> and *Robo1*<sup>-/-</sup> and *Robo2*<sup>-/-</sup> embryos, left and right primary branches are pseudocolored in green and red, respectively, and superimposed to show the lack of asymmetry in the *Robo1* and *2*<sup>-/-</sup> embryos. Histogram showing the branch number and the defasciculation distance in *Robo1*<sup>+/+</sup> and *Robo2*<sup>+/+</sup>, *Robo1*<sup>+/-</sup> and *Robo2*<sup>+/-</sup> and *Robo1*<sup>-/-</sup> and *Robo2*<sup>-/-</sup> embryos (R/L branch ratio: *Robo1*<sup>+/+</sup> and *Robo2*<sup>+/+</sup>  $2.30 \pm 0.37$ , versus *Robo1*<sup>-/-</sup> and *Robo2*<sup>-/-</sup>  $1.06 \pm 0.06$ ;  $p=0.00048$ ; R/L distance ratio: *Robo1*<sup>+/+</sup> and *Robo2*<sup>+/+</sup>  $4.99 \pm 0.89$ , versus *Robo1*<sup>-/-</sup> and *Robo2*<sup>-/-</sup>  $1.05 \pm 0.07$ ;  $p=3E-6$ , Mann-Whitney). (B) Immunodetection of Robo1 and loading control (Tub) in left and right HB9::GFP ventral cervical spinal cord and distribution of the relative amount of the two shorter forms (pink arrowheads) to the full-length form (black arrowhead). The graph shows the normalized left and right values obtained for the five western-blot (dots, 6–8 embryos per sample) and the mean  $\pm$  SEM (R versus L:  $p=0.01587$ , Wilcoxon signed rank); average fold-change is shown in brackets ( $1.22 \pm 0.10$ ). Normalization between lines was done on the Robo1 long form. (C) Ladder graph showing the left and right expression of *Mmp2* detected by microarray in three embryos. Average Log2(R/L ratio) shown in brackets. (D) Photomicrograph of cultured ventral cervical spinal cord motoneuron. The combination of in situ zymography with DQ-Gelatin and Islet1/2 staining enables the identification of motoneuron with MMP gelatinase activity. Histogram showing the amount of motoneuron with gelatinase activity in left and right samples (left  $23.37\% \pm 2.7$ ,  $N = 792$  versus right  $37.94\% \pm 2.1$ ,  $N = 797$ ;  $p=0.00109$ , Mann-Whitney). Histogram showing the gelatinase activity measured in cultures from *Rfx3*<sup>-/-</sup> embryos with symmetric lungs (Iso) and in cultures from *Rfx3*<sup>+/+</sup>, *Rfx3*<sup>+/-</sup> embryos (*Rfx3* wt:  $1.4 \pm 0.08$ ; *Rfx3* iso:  $0.96 \pm 0.08$ ,  $p=0.0013$ , Mann-Whitney). (E) NF staining of E14.5 diaphragms from wild-type and *Mmp2*<sup>-/-</sup> embryos. Left (green) and right (red) primary and secondary branch traces shown in the middle panel are superimposed in the right panel to compare the left and right patterns. Histograms showing the R/L ratios of branch number and defasciculation distances. Ratio of secondary branches: *Mmp2*<sup>+/+</sup> and *Mmp2*<sup>-/-</sup>  $1.74 \pm 0.07$ , versus *Mmp2*<sup>-/-</sup>  $1.21 \pm 0.10$ ;  $p=0.00029$ ; Figure 5 continued on next page

Figure 5 continued

defasciculation distance: *Mmp2*<sup>+/+</sup> and *Mmp2*<sup>-/+</sup>  $5.33 \pm 0.44$ , versus *Mmp2*<sup>-/-</sup>  $3.49 \pm 0.38$ ;  $p=0.022$ , Mann-Whitney. Scale bar: 200  $\mu\text{m}$  (A,E), 10  $\mu\text{m}$  (D). Numerical values used to generate the graphs are accessible in **Figure 5—source data 1**.

DOI: [10.7554/eLife.18481.022](https://doi.org/10.7554/eLife.18481.022)

The following source data is available for figure 5:

**Source data 1.** Slit/Robo signalling controls asymmetry of L/R phrenic nerves and Robo1 exhibits different processing levels in left and right cervical motoneurons.

DOI: [10.7554/eLife.18481.023](https://doi.org/10.7554/eLife.18481.023)

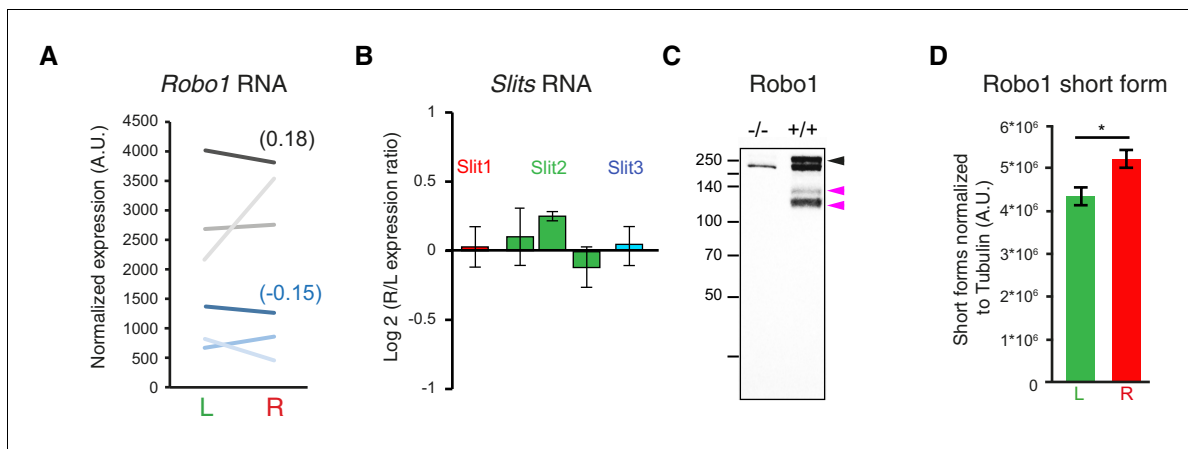

**Figure 5—figure supplement 1.** Post-translational regulation of Robo1. (A) Ladder graph of *Robo1* RNA expression detected by the two probes present on the microarray for each of the three embryos (probe1 — black; probe2 — blue; average Log<sub>2</sub>(R/L ratio) shown in brackets). (B) Histogram showing the average R/L ratio of expression (in log<sub>2</sub>) assessed by the microarray probes targeting *Slit1*, *Slit2* and *Slit3*. Error bars represent SEM. (Note that 1.5 fold-change gives 0.5849 in log<sub>2</sub>.) (C) Immunodetection of Robo1 in spinal cord lysates of *Robo1*<sup>-/-</sup> and *Robo2*<sup>-/-</sup> and wild-type tissues. The antibody detects three specific bands. Black arrowhead points to the expected full-length Robo1 and the two pink arrowheads point to the two shorter forms. (D) Graph shows the normalized left and right values obtained for the four western-blot (6–8 embryos per sample) and the mean ± SEM (R versus L: p=0.028, Mann-Whitney; average fold-change is 1.22 ± 0.11). Normalization between lines was done on the tubulin band. Numerical values used to generate the graphs are accessible in **Figure 5—figure supplement 1—source data 1**.

DOI: 10.7554/eLife.18481.024

The following source data is available for figure 5:

**Figure supplement 1—Source data 1.** Post-translational regulation of Robo1 and biased expression of *Mmp2*.

DOI: 10.7554/eLife.18481.025

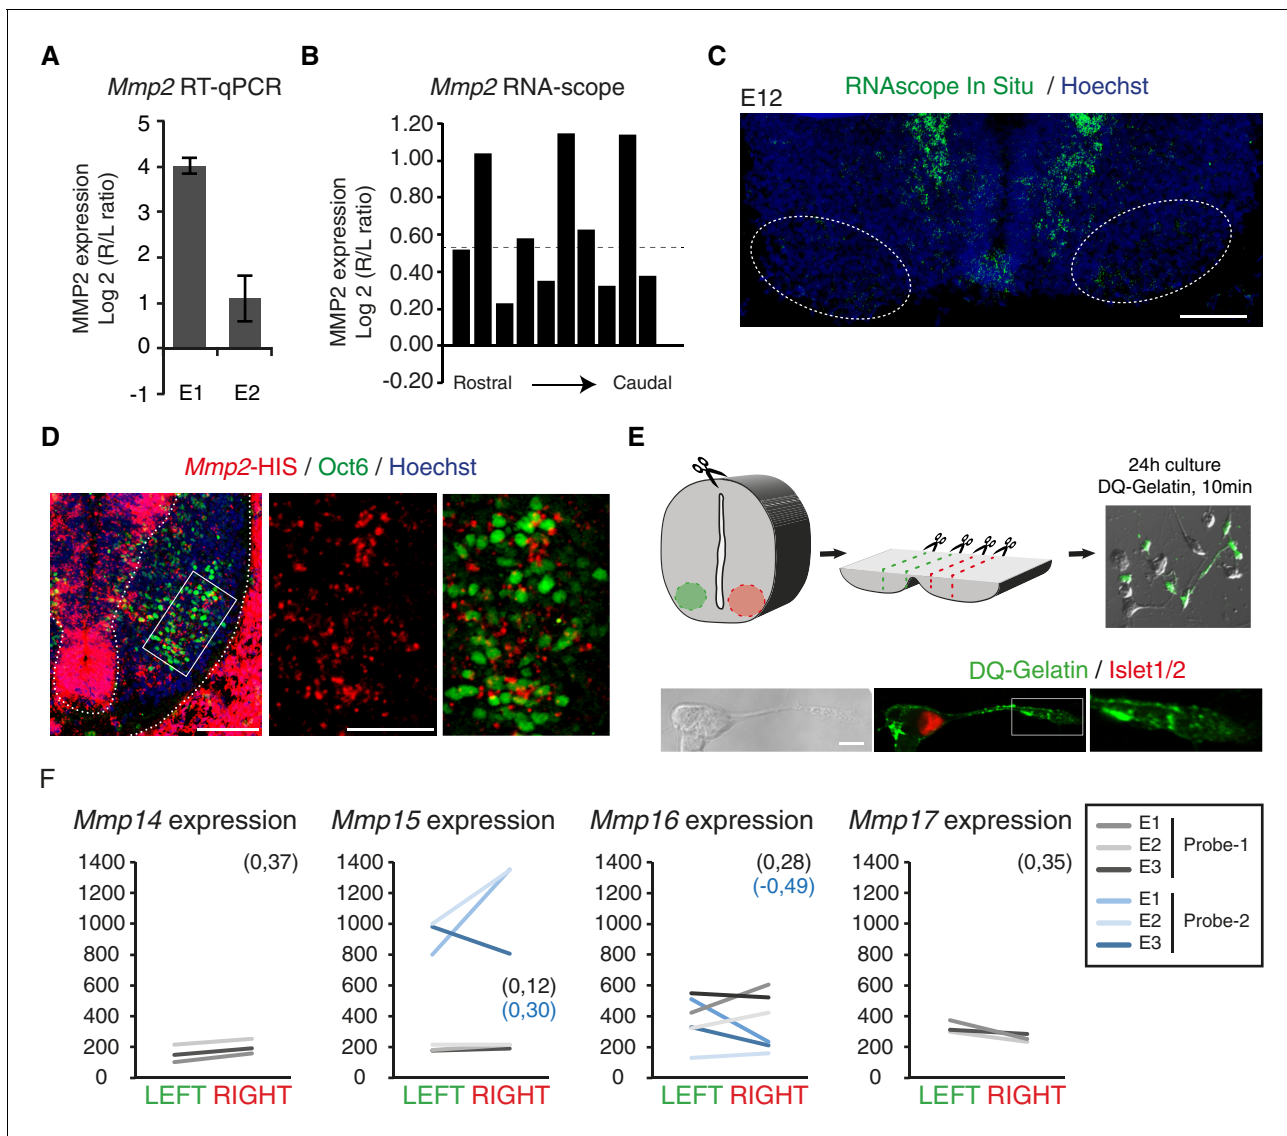

**Figure 5—figure supplement 2.** Asymmetric expression of MMP2. (A) Histogram showing the average ratio of *Mmp2* RNA expression assessed by qPCR in cervical motoneurons from two E11 embryos. Expression normalized to GAPDH. (B) Histogram showing the R/L ratio (in log<sub>2</sub>) of the surface labelled by the RNAscope *Mmp2* probe in the motoneuron region. Each bar shows the R/L ratio for one section of a series of serial sections that cover the entire cervical spinal cord region. The dashed line highlights the log<sub>2</sub> value that corresponds to a 1.5-fold change. (C) *Mmp2* RNAscope in situ hybridization on an E12 transversal spinal cord section at cervical levels. (D) *Mmp2* in situ hybridization combined with Pou3f1 immunolabeling on E11 transversal spinal cord sections. Enlarged panels of the motoneuron domain (right) show that *Mmp2* transcripts are detected within the Pou3f1-positive domain. (E) Schematics of the dissection and the in situ zymography (ISZ) procedure for E12.5 ventral cervical spinal cord. Cleavage-induced fluorescence of DQ-Gelatin (green) is overlaid over the phase contrast image. Islet1-positive motoneurons exhibit gelatinase activity in different cellular regions, including the axon and the growth cone (lower right panel). (F) Ladder graph showing the expression signals in the left and right laser-captured samples of the three embryos detected with the microarray *Mmp14*, *Mmp15*, *Mmp16* and *Mmp17* probes, average Log<sub>2</sub>(R/L ratio) shown in brackets. Scale bars: 100  $\mu$ m (C) and (D left panel); 200  $\mu$ m (D right panel) and 10  $\mu$ m (E). Numerical values used to generate the graphs are accessible in **Figure 5—figure supplement 2—source data 2**.

DOI: [10.7554/eLife.18481.026](https://doi.org/10.7554/eLife.18481.026)

The following source data is available for figure 5:

**Figure supplement 2—Source data 2.** Asymmetric expression of *Mmp2* in cervical motoneurons and expression of other MMPs.

DOI: [10.7554/eLife.18481.027](https://doi.org/10.7554/eLife.18481.027)
